# Supplementary material
Source: PubMed Central journal article supplement (PMC2892000)
Supplement: NIHMS198605-supplement-Supplementary_Table_1.pdf [file NIHMS198605-supplement-Supplementary_Table_1.pdf]

## Supplementary Table I

### CD38 Resequencing Primers (for amplification)

|   | Forward<br>or<br>Reverse | Region amplified<br>by the Primer pair | M13 Tag Sequence   | Primer Sequence           |
|---|--------------------------|----------------------------------------|--------------------|---------------------------|
| 1 | F                        | 5'-FR & Exon 1                         |                    | CACAGTCCAAAAAGTCATCCTG    |
|   | R                        |                                        |                    | GGA CTCCCTACTCAGCACCA     |
| 2 | F                        | Exon 2                                 |                    | CCCCTGGTAGACTGCATGTT      |
|   | R                        |                                        |                    | GCCTGCAAATTCATTCTA        |
| 3 | F                        | Exon 3                                 | TGTAAAACGACGGCCAGT | TTTTTCATTTACAAAAGTGTGGATT |
|   | R                        |                                        | CAGGAAACAGCTATGACC | GCTCTGTCCTCCACACTAATCA    |
| 4 | F                        | Exon 4                                 |                    | CTCAAAACTTGCCACTGTGTTC    |
|   | R                        |                                        |                    | TAAATTTTCTGGCATGTGCATC    |
| 5 | F                        | Exon 5                                 |                    | ATGATGAATGGTGGGCATTT      |
|   | R                        |                                        |                    | CCAGGCCTGCAAAAGTTAAG      |
| 6 | F                        | Exon 6 & Exon 7                        |                    | TGATTTGCAATTTGATGTGTCA    |
|   | R                        |                                        |                    | ATCATCAAGGCCCAAGAAAGAT    |
| 7 | F                        | Exon 8 & 3'-UTR                        | TGTAAAACGACGGCCAGT | AAAAGGGGCTTCTCCATTA       |
|   | R                        |                                        |                    | TCACCAACATGACCCATGAC      |
